# Supplementary material
Source: HighWire-hosted journal article supplement (https://bmjopenquality.bmj.com/highwire/filestream/136064/field_highwire_adjunct_files/2/ds3228.docx)
Supplement: ds3228.docx [file ds3228.docx]

PDSA Cycle 1: Results

|  | **Baseline measurement** |
| --- | --- |
| **Time spent updating list in morning (mins)** | 20 |
| **Time spent updating list in evening (mins)** | 75 |
| **Total time spent updating the list (mins)** | 95 |
| **Difficulty updating the list (1=very easy, 10 = very difficult)** | 7 |
| **Difficulty adding new patients to the list (1=very easy, 10 = very difficult)** | 6 |
| **Frequency of problems encountered with the list** | Daily |
| **Overall satisfaction with the list** | Yes: 0%  No: 100% |

PDSA Cycle 2: Results

|  | **Baseline measurement** | **New surgical handover list** | **Improvement** |
| --- | --- | --- | --- |
| **Time spent updating list in morning (mins)** | 20 | 13 | **7** |
| **Time spent updating list in evening (mins)** | 75 | 40 | **35** |
| **Total time spent updating the list (mins)** | 95 | 53 | **42** |
| **Difficulty updating the list (1=very easy, 10 = very difficult)** | 7 | 2 | **5** |
| **Difficulty adding new patients to the list (1=very easy, 10 = very difficult)** | 6 | 2 | **4** |
| **Frequency of problems encountered with the list** | Daily | Weekly | **Reduced frequency of problems** |
| **Overall satisfaction with the list** | Yes: 0%  No: 100% | Yes: 100%  No: 0% | **100% Increase in satisfaction** |

E youPDSA Cycle 3: Results

|  | **Baseline measurement** | **New surgical handover list** | **Improvement** |
| --- | --- | --- | --- |
| **Total time spent updating the list (mins)** | 26 | 18 | **8** |
| **Difficulty updating the list (1=very easy, 10 = very difficult)** | 7 | 4 | **3** |
| **Is the weekend handover list often in the correct order?** | Yes: 25%  No: 75% | Yes: 100%  No: 0% | Great improvement in the correct ordering of the list |
|  |  |  |  |
| **Overall satisfaction with the list** | Yes: 12.5%  No: 87.5% | Yes: 62.5%  No: 37.5% | Improvement in satisfaction with the list, but a large degree of dissatisfaction remains |
